# Supplementary material for: Investigating the Influence of Vaccine Literacy, Vaccine Perception and Vaccine Hesitancy on Israeli Parents’ Acceptance of the COVID-19 Vaccine for Their Children: A Cross-Sectional Study
Source: MDPI journal article supplement (doi:10.3390/vaccines9121391), 2021-11-24
Supplement: s1 [file s1]

### Tools employed to assess vaccine literacy, COVID-19 vaccine perception and psychological antecedents to vaccination

| Variable (Cronbach's alpha)                        | Measure and items                                                                                                                                                                                                                                                                                                                                                                                                                                                                                                                                                                                                                                                                                                                                          | Assessment (score)                                                                                                             |
|----------------------------------------------------|------------------------------------------------------------------------------------------------------------------------------------------------------------------------------------------------------------------------------------------------------------------------------------------------------------------------------------------------------------------------------------------------------------------------------------------------------------------------------------------------------------------------------------------------------------------------------------------------------------------------------------------------------------------------------------------------------------------------------------------------------------|--------------------------------------------------------------------------------------------------------------------------------|
| VL functional skills ( $\alpha=0.82$ )             | <p>When reading or listening to information about COVID-19 vaccines:</p> <ol style="list-style-type: none"> <li>1. Did you find words you didn't know?</li> <li>2. Did you find that the texts were difficult to understand?</li> <li>3. Did you need much time to understand them?</li> <li>4. Did you need someone to help you understand them?</li> </ol>                                                                                                                                                                                                                                                                                                                                                                                               | <p>Ordinal, 4 points Likert scale for frequency:</p> <p>Often (1), Sometimes (2), Rarely (3), Never (4)</p>                    |
| VL interactive / critical skills ( $\alpha=0.77$ ) | <p>When looking for information about COVID-19 vaccines:</p> <ol style="list-style-type: none"> <li>1. Have you consulted more than one source of information?</li> <li>2. Did you find the information you were looking for?</li> <li>3. Have you had the opportunity to use the information?</li> <li>4. Did you discuss what you understood about COVID-19 vaccination in children with a healthcare provider?</li> <li>5. Did you consider whether the information collected was about your child?</li> <li>6. Have you considered the credibility of the sources?</li> <li>7. Did you check whether the information was correct?</li> <li>8. Did you find any useful information to decide on whether or not to get your child vaccinated?</li> </ol> | <p>Ordinal, 4 points Likert scale for frequency:</p> <p>Often (4), Sometimes (3), Rarely (2), Never (1)</p>                    |
| COVID-19 vaccine perception ( $\alpha=0.80$ )      | <p>How much do you agree with the following statements?</p> <ol style="list-style-type: none"> <li>1. The COVID-19 vaccine causes serious side effects</li> <li>2. The COVID-19 vaccine might cause lasting health problems</li> <li>3. There is no need to vaccinate children against COVID-19 because they have a strong immune system</li> <li>4. There is no need to vaccinate children against COVID-19 because the disease among children is usually mild</li> <li>5. There is no need to vaccinate children against COVID-19 because herd immunity has been achieved in Israel</li> </ol>                                                                                                                                                           | <p>Ordinal, 4 points Likert scale for agreement:</p> <p>Strongly agree (4), Agree (3), Disagree (2), Strongly disagree (1)</p> |

6. Only children with serious comorbidities should be vaccinated
7. Being infected with COVID-19 is the safest way to achieve immunization in children

|                                                 |                                                                                                                                                                                                                                                                                                                                                   |                                                                                 |
|-------------------------------------------------|---------------------------------------------------------------------------------------------------------------------------------------------------------------------------------------------------------------------------------------------------------------------------------------------------------------------------------------------------|---------------------------------------------------------------------------------|
| The 5C psychological antecedents of vaccination | How much do you agree with the following statements?                                                                                                                                                                                                                                                                                              | Ordinal, 5 points Likert scale for agreement:                                   |
| Confidence ( $\alpha=0.86$ )                    | <ol style="list-style-type: none"> <li>1. I am completely confident that COVID-19 vaccines are safe</li> <li>2. I am completely confident that COVID-19 vaccines are effective</li> <li>3. Regarding COVID-19 vaccines, I am confident that public authorities decide in the best interest of the community</li> </ol>                            | Strongly agree (5), Agree (2), Neutral (3), Disagree (2), Strongly disagree (1) |
| Complacency ( $\alpha=0.85$ )                   | <ol style="list-style-type: none"> <li>4. Vaccination against COVID-19 for children is unnecessary</li> <li>5. The immune system of children is so strong; it also protects them against COVID-19</li> <li>6. COVID-19 disease in children is not severe; vaccinate them is superfluous</li> </ol>                                                |                                                                                 |
| Constrains ( $\alpha=0.78$ )                    | <ol style="list-style-type: none"> <li>7. Everyday stress prevents me from having my child vaccinated against COVID-19</li> <li>8. For me, it is inconvenient to have my child vaccinated against COVID-19</li> <li>9. Visiting the doctor makes me feel uncomfortable; this keeps me from having my child vaccinated against COVID-19</li> </ol> |                                                                                 |
| Calculation ( $\alpha=0.75$ )                   | <ol style="list-style-type: none"> <li>10. When I think about having my child vaccinated against COVID-19, I weigh its benefits and risks to make the best decision possible</li> <li>11. I closely consider whether COVID-19 vaccine is useful for my child</li> </ol>                                                                           |                                                                                 |

Collective responsibility  
( $\alpha=0.85$ )

12. It is important for me to fully understand the topic of vaccination before I get my child vaccinated
13. Like everyone else, I must get my child vaccinated
14. Having my child vaccinated against COVID-19 can protect people with a weaker immune system
15. Vaccination against COVID-19 is a collective action to prevent the spread of the disease
